# Supplementary material
Source: publisher site journal article supplement (https://www.dovepress.com/article/492159)
Supplement: Supplementary file 1 [file get_supplementary_file.php]

**Supplement Table 1. Characteristics of patients diagnosed with post-COVID-19 condition and pulmonary embolism**

|  | Patient 1 | Patient 2 | Patient 3 | Patient 4 | Patient 5 |
| --- | --- | --- | --- | --- | --- |
| Age / Sex | 63 / Male | 42 / Female | 32 / Female | 81 / Female | 61 / Male |
| Pre-existing conditions | Urothelial cell carcinoma, chronic kidney disease | Thyroid goiter | nil | Diabetes mellitus | Diabetes mellitus |
| Post-COVID symptoms | Malaise,  chronic cough | Chest tightness,  palpitation, breathlessness, insomnia,  poor appetite | Blurred vision,  malaise,  headache  chest pain,  breathlessness | Breathlessness, inattention, forgetfulness | Malaise,  breathlessness |
| Hospitalization | No | No | No | No | No |
| Antiviral agent | Nirmatrelvir/  Ritonavir | No | No | Nirmatrelvir/  Ritonavir | No |
| White blood cell (/μL) | 7380 | 8570 | 8520 | 8150 | 4600 |
| Neutrophil (%) | 74.6 | 62.5 | 62.8 | 62.3 | 46.3 |
| Lymphocyte (%) | 15.2 | 29.5 | 28.6 | 30.3 | 40.2 |
| Eosinophil (%) | 0.8 | 1.2 | 3.6 | 1.2 | 5.2 |
| Hemoglobin (g/dL) | 15.4 | 15.4 | 12.8 | 13.8 | 12.7 |
| Platelet (103/μL) | 326 | 298 | 307 | 269 | 167 |
| C-reactive protein (mg/dL) | 2.8 | 0.1 | 0.3 | 0.3 | 0.1 |
| Alanine aminotransferase (U/L) | 22 | 22 | 14 | 23 | 54 |
| Aspartate aminotransferase (U/L) | 17 | 18 | 15 | 22 | 26 |
| Total bilirubin (mg/dL) | 0.5 | 1.2 | 0.5 | 0.6 | 0.31 |
| Alkaline phosphatase (U/L) | 73 | 80 | 82 | 76 | 58 |
| Creatinine (mg/dL) | 1.54 | 0.95 | 0.71 | 0.75 | 1.11 |
| Creatine kinase (U/L) | 99 | 48 | 109 | 49 | 82 |
| D-dimer (mg/L FEU) | 22.0 | 0.2 | 0.6 | 0.7 | 0.3 |
| Pulmonary embolism diagnostic tool | Computed tomography angiography | Lung perfusion scan | Lung perfusion scan | Lung perfusion scan | Lung perfusion scan |
| Outpatient follow-up times in 6 months after COVID-19 diagnosis | 7 | 6 | 12 | 15 | 16 |
| 1-year mortality | Yes | No | No | No | No |

**Supplement Table 1. Characteristics of patients diagnosed with post-COVID-19 condition and pulmonary embolism (continued)**

|  | Patient 6 | Patient 7 | Patient 8 | Patient 9 |
| --- | --- | --- | --- | --- |
| Age / Sex | 69 / Male | 61 / Female | 59 / Male | 70 / Female |
| Pre-existing conditions | Rheumatoid arthritis | Waldenstrom macroglobulinemia | Diabetes mellitus | Lung cancer |
| Post-COVID symptoms | Malaise,  breathlessness | Malaise, dizziness, insomnia | Chest tightness, insomnia | Chest tightness, breathlessness |
| Hospitalization | No | No | Yes | Yes |
| Antiviral agent | Nirmatrelvir/  Ritonavir | No | Remdesivir | Remdesivir |
| White blood cell (/μL) | 8840 | 6290 | 8480 | 7800 |
| Neutrophil (%) | 73 | 74.4 | 75 | 50.5 |
| Lymphocyte (%) | 13 | 17 | 16 | 41.8 |
| Eosinophil (%) | 0.1 | 0.2 | 0 | 3.3 |
| Hemoglobin (g/dL) | 14.6 | 12.8 | 15.5 | 14.7 |
| Platelet (103/μL) | 310 | 167 | 154 | 263 |
| C-reactive protein (mg/dL) | 2.9 | 0.9 | 11.7 | 1.6 |
| Alanine aminotransferase (U/L) | 36 | 21 | 48 | 45 |
| Aspartate aminotransferase (U/L) | 19 | 23 | 34 | 27 |
| Total bilirubin (mg/dL) | 0.6 | 1.26 | 0.48 | 0.6 |
| Alkaline phosphatase (U/L) | 87 | 179 | 98 | 97 |
| Creatinine (mg/dL) | 1.18 | 0.61 | 1.15 | 0.94 |
| Creatine kinase (U/L) | 62 | 22 | 294 | 23 |
| D-dimer (mg/L FEU) | 1.8 | 1.9 | 0.2 | 14.0 |
| Pulmonary embolism diagnostic tool | Computed tomography angiography | Computed tomography angiography | Computed tomography angiography | Computed tomography angiography |
| Outpatient follow-up times in 6 months after COVID-19 diagnosis | 3 | 23 | 10 | 6 |
| 1-year mortality | No | Yes | No | Yes |

**Supplement Table 2. Characteristics of patients diagnosed with post-COVID-19 condition and pulmonary embolism (1-year follow-up)**

|  | Patient 2 | Patient 3 | Patient 4 | Patient 5 | Patient 8 |
| --- | --- | --- | --- | --- | --- |
| White blood cell (/μL) | 3640 | 9400 | 6950 | 3810 | 6480 |
| Neutrophil (%) | 35.4 | 71.8 | 81.4 | 52.3 | 65.7 |
| Lymphocyte (%) | 45.9 | 19.1 | 13.8 | 35.7 | 26.9 |
| Eosinophil (%) | 4.1 | 2.6 | 1 | 5 | 1.7 |
| Hemoglobin (g/dL) | 13.5 | 12.9 | 13 | 12.7 | 15.6 |
| Platelet (103/μL) | 263K | 348K | 197K | 172K | 262K |
| C-reactive protein (mg/dL) | 0.1 | 0.8 | 0.1 | 0.1 | 0.1 |
| Procalcitonin (ng/mL) | 0.02 | 0.03 | 0.03 | 0.06 | 0.37 |
| Alanine aminotransferase (U/L) | 13 | 18 | 17 | 43 | 38 |
| Aspartate aminotransferase (U/L) | 13 | 16 | 16 | 44 | 32 |
| Total bilirubin (mg/dL) | 0.84 | 0.64 | 0.4 | 0.48 | 0.91 |
| Direct bilirubin (mg/dL) | 0.35 | 0.21 | 0.19 | 0.23 | 0.27 |
| Alkaline phosphatase (U/L) | 90 | 75 | 53 | 47 | 77 |
| Albumin (g/dL) | 4.4 | 4.4 | 4.3 | 4.1 | 4.7 |
| Lactic dehydrogenase (U/L) | 157 | 201 | 226 | 195 | 193 |
| Ammonia (ug/dL) | 29 | 78 | 44 | 45 | 47 |
| Blood urea nitrogen (mg/dL) | 6 | 12 | 12 | 11 | 21 |
| Creatinine (mg/dL) | 0.58 | 0.65 | 0.72 | 1.05 | 1.22 |
| Sodium (mEq/L) | 139 | 139 | 143 | 138 | 141 |
| Potassium (mEq/L) | 4.3 | 4.1 | 3.7 | 4.9 | 4 |
| Calcium (mg/dL) | 9.6 | 9.3 | 9.1 | 9.4 | 9.7 |
| Magnesium (mg/dL) | 1.9 | 2.1 | 2.1 | 1.9 | 2.1 |
| Creatine kinase (U/L) | 48 | 90 | 101 | 110 | 76 |
| Creatine kinase MB (ng/mL) | <1 | <1 | 1.1 | <1 | <1 |
| Troponin-T (ng/L) | 3.77 | 3.21 | 10.68 | 7.97 | 3.26 |
| D-dimer (mg/L FEU) | 0.23 | 0.51 | 1.03 | 0.38 | 0.26 |
| Chest X-ray | No active lung lesion | No active lung lesion | No active lung lesion | No active lung lesion | No active lung lesion |
| Electrocardiogram | Sinus rhythm | Sinus rhythm | Sinus rhythm | Sinus rhythm | Sinus rhythm |
| EuroQol visual analogue scale | 85 | 70 | 100 | 80 | 90 |
| EQ-5D-5L index | 1.0000 | 0.7261 | 1.0000 | 1.0000 | 0.9132 |

**Notes:**

**Abbreviations:** EQ-5D-5L, EuroQoL 5-Dimension 5-Level.
